# Supplementary material
Source: publisher figshare collection journal article supplement (https://tandf.figshare.com/ndownloader/files/15494351)
Supplement: Supplementary file 1 [file 15494351]

## Supplementary Information

### Single-Component, Low Molecular Weight Organic Supergelators based on Chiral Barbiturate Scaffolds

Daniel T. Seidenkranz, Kurt A. Langworthy, Lev N. Zakharov, Michael D. Pluth\*

Department of Chemistry and Biochemistry  
Materials Science Institute  
University of Oregon  
Eugene, OR 97403

Contact Information:  
Michael D. Pluth  
pluth@uoregon.edu

#### Table of Contents

|                                          |    |
|------------------------------------------|----|
| 1. General experimental Scheme           | S2 |
| 2. NMR spectra                           | S3 |
| 3. Representative DOSY plots and fitting | S7 |
| 9. ORTEP representations of <b>1b</b>    | S8 |

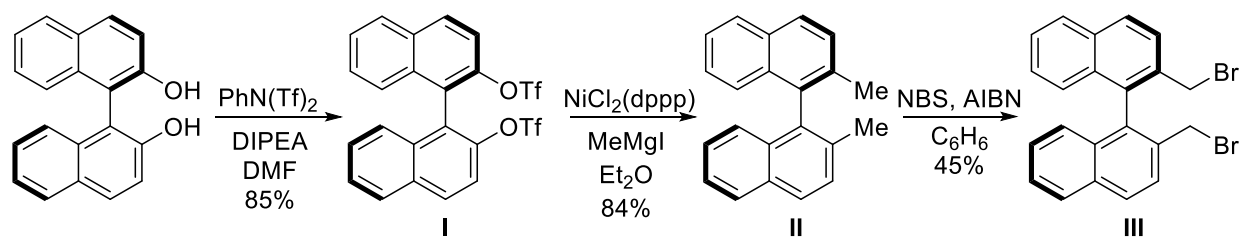

**Scheme S1.** Synthesis of dibromomethylbinaphthalene with (*R*)-stereochemistry shown.

## NMR Spectra of Compounds 1-3

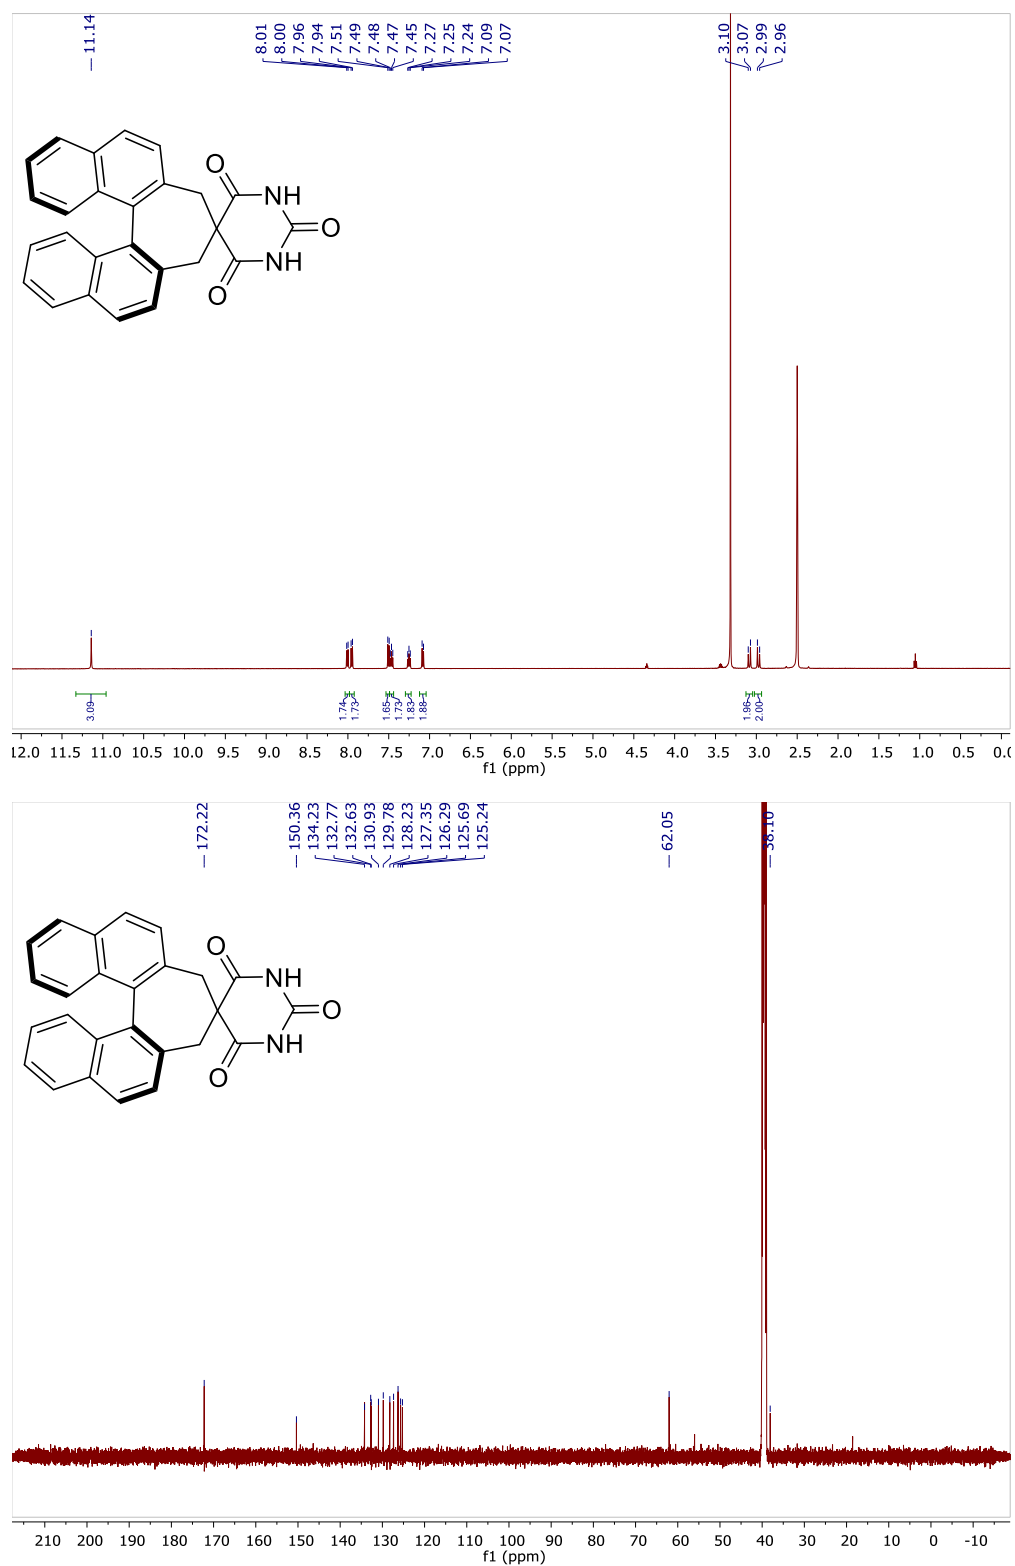

Figure S1.  $^1\text{H}$  (500 MHz) and  $^{13}\text{C}\{^1\text{H}\}$  (126 MHz) NMR spectra of **1a** in  $d_6$ -DMSO.

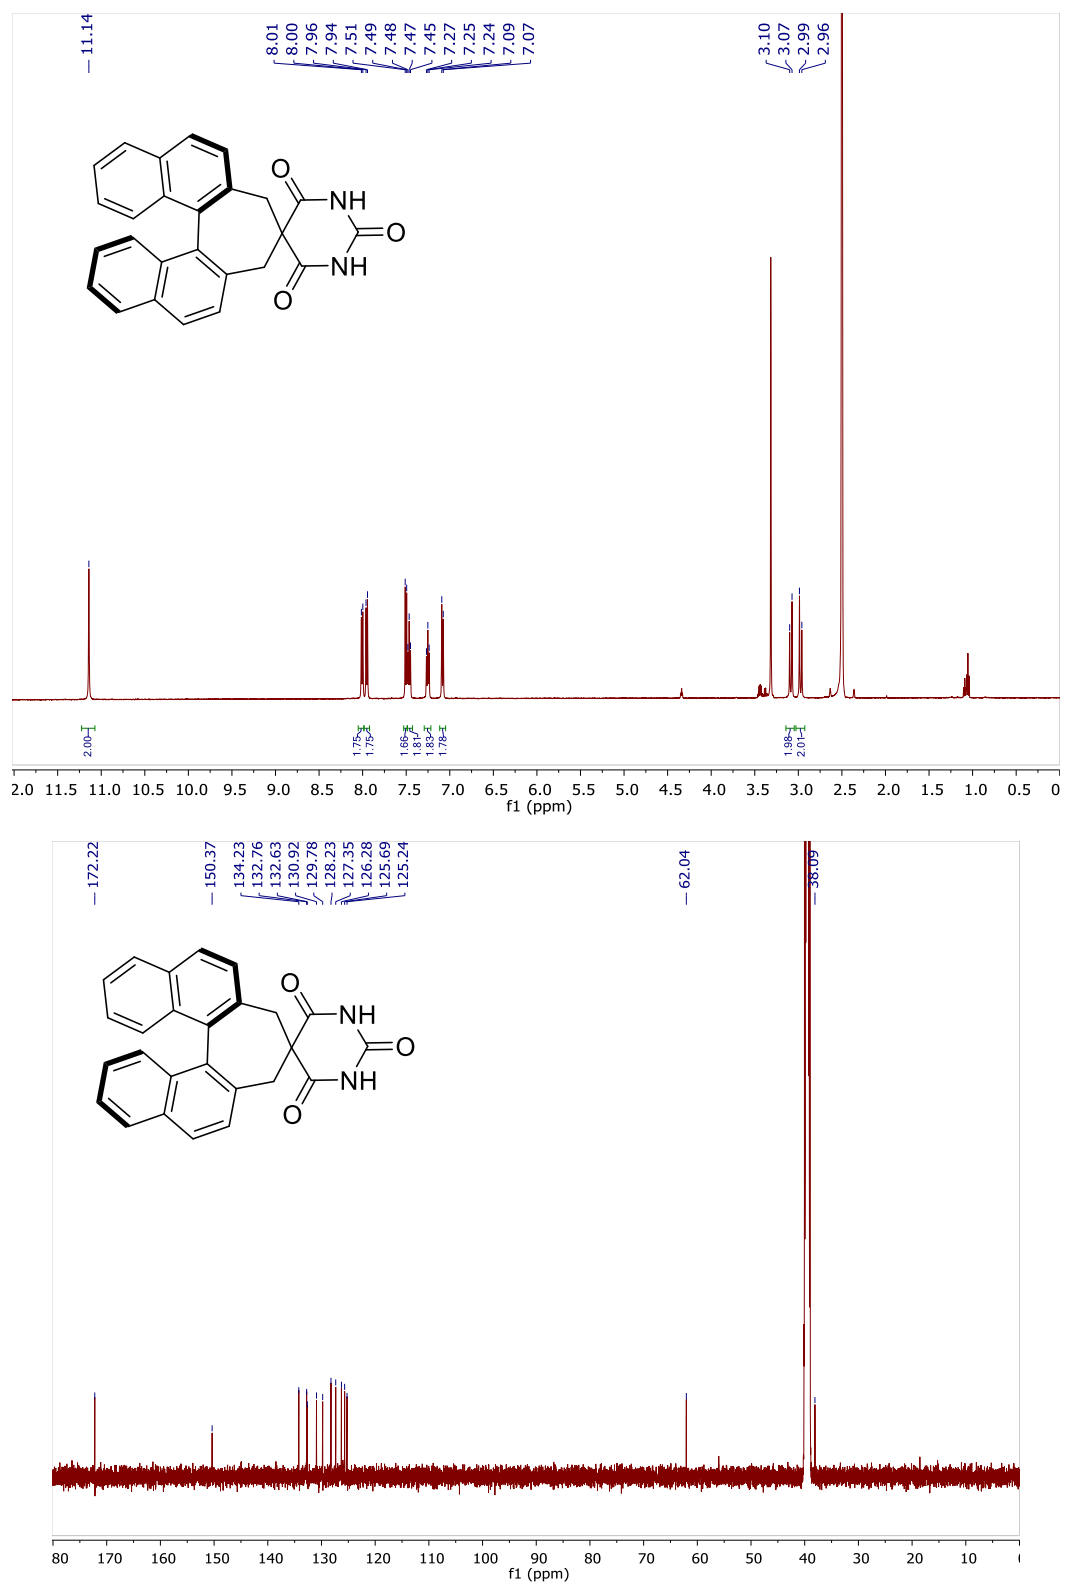

**Figure S2.** <sup>1</sup>H (500 MHz) and <sup>13</sup>C{<sup>1</sup>H} (126 MHz) NMR spectra of **1b** in d<sub>6</sub>-DMSO.

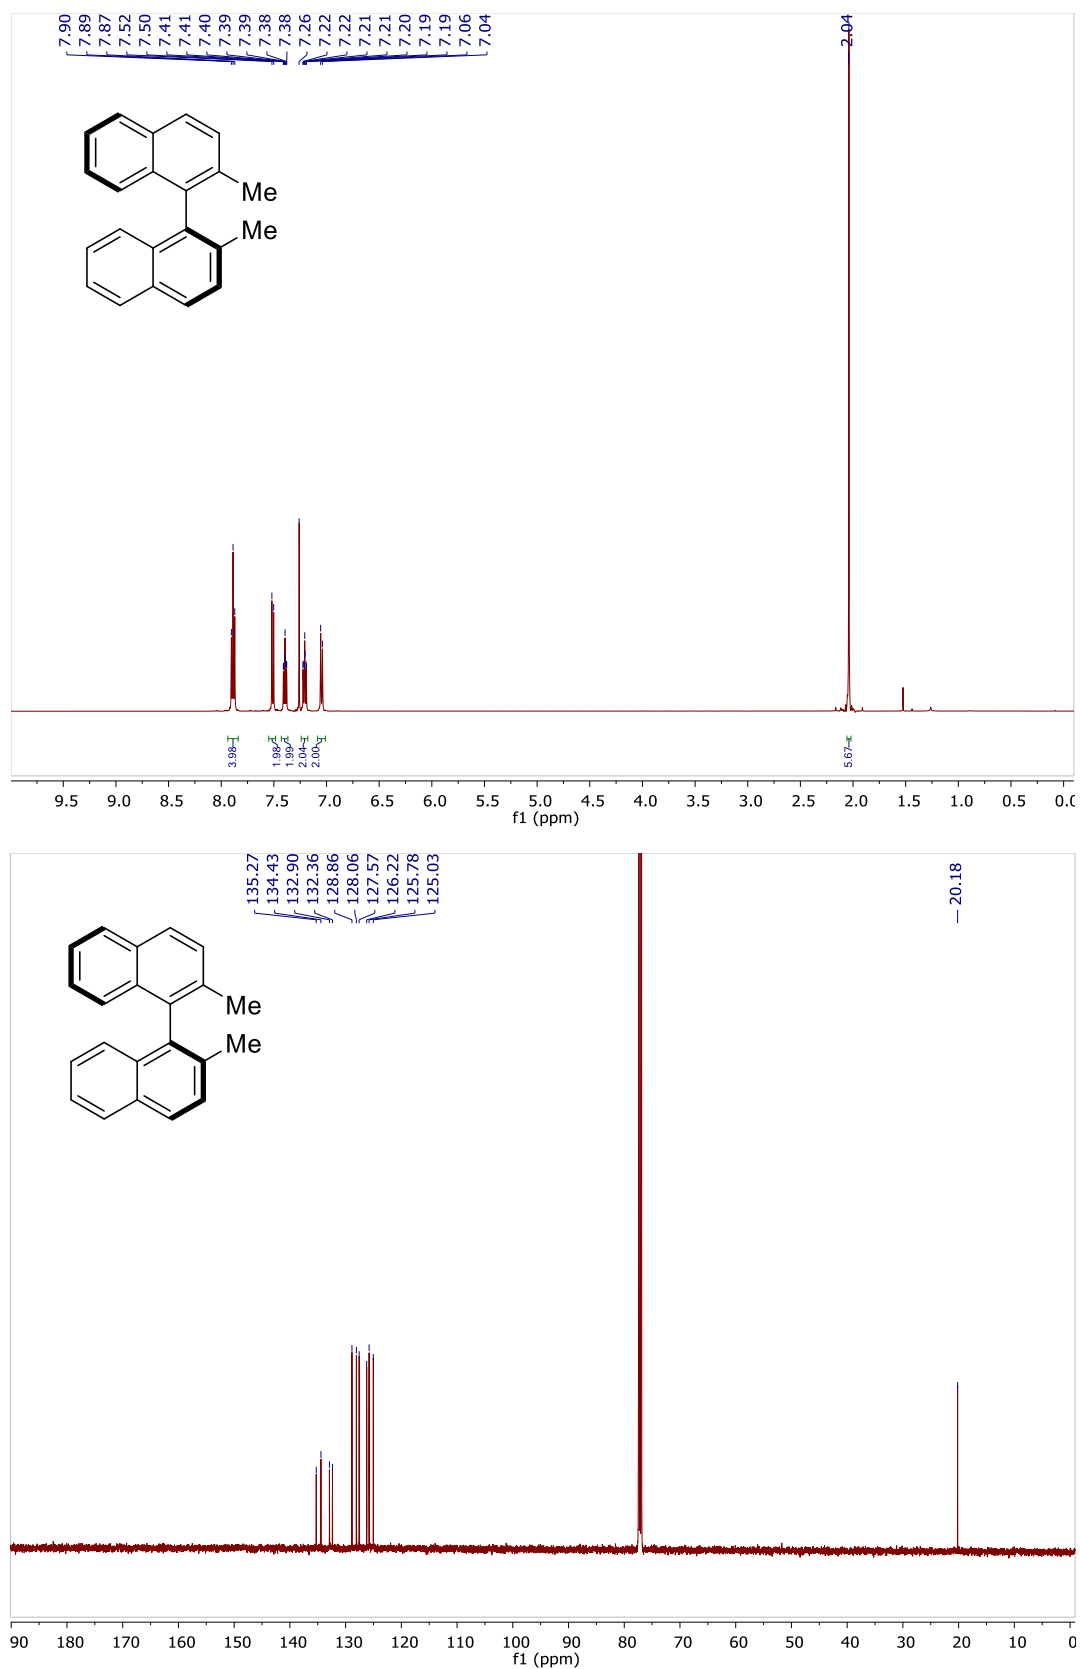

**Figure S3.**  $^1\text{H}$  (500 MHz) and  $^{13}\text{C}\{^1\text{H}\}$  (126 MHz) NMR spectra of **2** in  $\text{CDCl}_3$ .

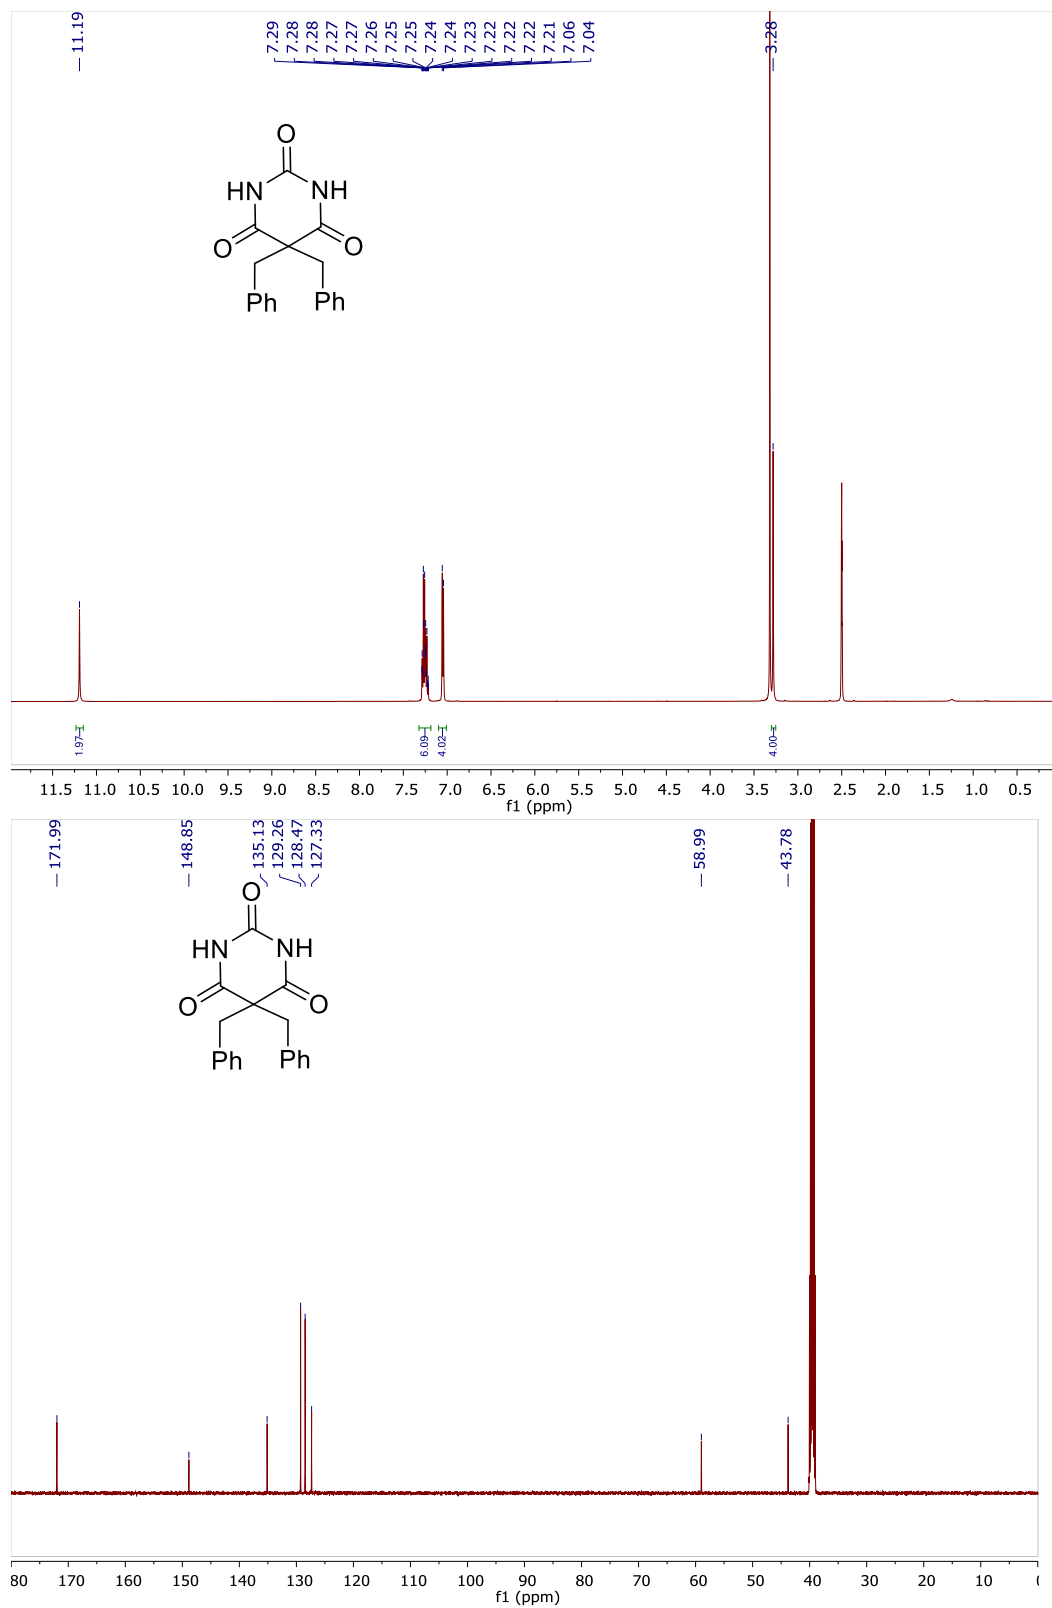

**Figure S4.**  $^1\text{H}$  (500 MHz) and  $^{13}\text{C}\{^1\text{H}\}$  (126 MHz) NMR spectra of **3** in  $d_6$ -DMSO.

## Representative DOSY Plots and Fitting

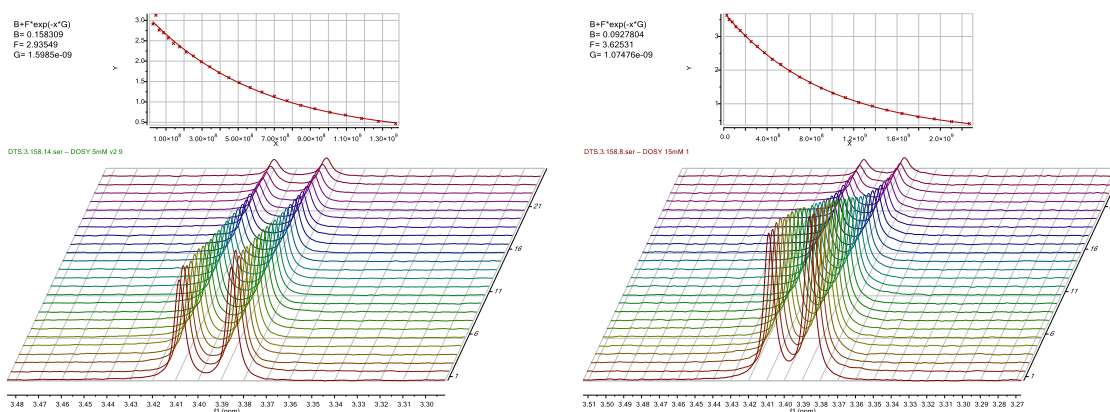

**Figure S5:** Representative exponential decay plots from DOSY experiments of **1a** at 5 mM (left) and 15 mM (right) showing doublet at 3.40 ppm and the corresponding exponential decay fits.

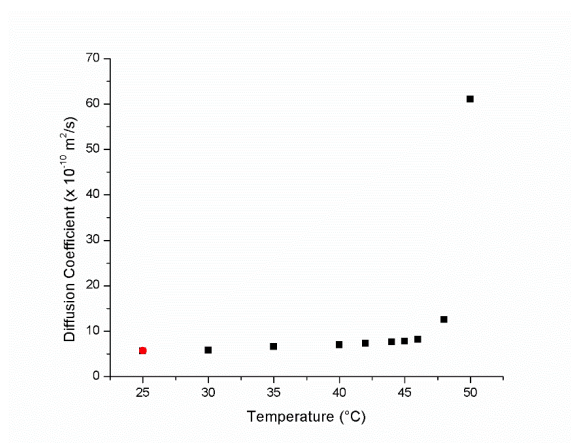

**Figure S6.** Variable temperature DOSY of a 20 mM gel sample of **1a** in  $\text{CDCl}_3$ . The black squares represent a sequential increase in temperature until the  $T_{\text{gel}}$  was reached. The red circle represents the diffusion coefficient after cooling the sample back to 25  $^\circ\text{C}$  from 50  $^\circ\text{C}$ .

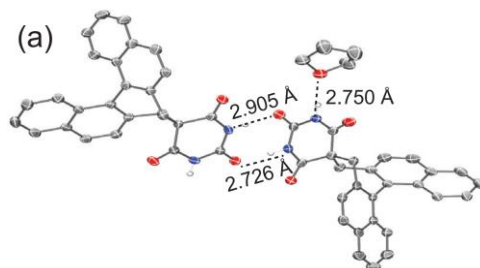

**Figure S7.** ORTEP representation of smallest repeat unit of **1b**. Thermal ellipsoids shown at 50% probability. Non-H bonding hydrogens omitted for clarity.

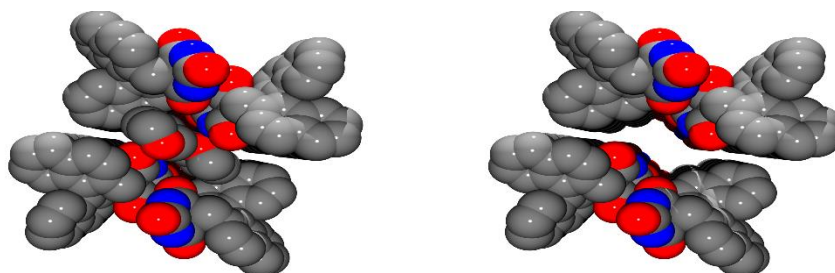

**Figure S8.** Space-filling representation of columnar stack of **1b** viewed down screw axis with (left) and without (right) THF co-solvent. H bonds omitted for clarity.
